# Supplementary material
Source: publisher site journal article supplement (https://e-cmh.org/upload/media/cmh-2022-0136-suppl2.pdf)
Supplement: Supplementary file 1 [file cmh-2022-0136-suppl2.pdf]

**Supplementary Table 2.** Summary of included articles and quality assessment

| Study                                   | Country  | Study design  | Study cohort     | Method of diagnosis for depression | Method of diagnosis for anxiety | Depression diagnosis | Anxiety diagnosis | Time of depression diagnosis | Total patients | No. of depression | No. of anxiety | Age (years) | BMI (kg/m <sup>2</sup> ) | Female (%) | Diabetes (%) | Smoking (%) | Alcohol (%) | Cirrhosis (%) | Curative treatment (%) | JBI Quality Assessment |
|-----------------------------------------|----------|---------------|------------------|------------------------------------|---------------------------------|----------------------|-------------------|------------------------------|----------------|-------------------|----------------|-------------|--------------------------|------------|--------------|-------------|-------------|---------------|------------------------|------------------------|
| Paro et al. <sup>1</sup> (2021)         | USA      | Retrospective | Population-based | Clinician-rated                    |                                 | ICD-9/ DSM-V         |                   | During treatment             | 4,441          | 142               |                |             |                          |            |              |             |             |               |                        | 8                      |
| Feldbrügge et al. <sup>2</sup> (2021)   | Germany  | Prospective   | Hospital cohort  | Self-rated                         | Self-rated                      | HADS                 | HADS              | After treatment              | 98             | 7                 | 19             | 68.5±26.34  | 29.83±2.32               | 27.6       |              |             |             |               | 100.0                  | 8                      |
| Wang et al. <sup>3</sup> (2019)         | China    | Prospective   | Hospital cohort  | Self-rated                         | Self-rated                      | HADS                 | HADS              | After treatment              | 136            | 40                | 33             | 59.4±11     |                          | 19.1       | 11.0         |             |             |               | 100.0                  | 7                      |
| Lee et al. <sup>4</sup> (2019)          | Taiwan   | Prospective   | Hospital cohort  | Self-rated                         | Self-rated                      | BDI                  | BAI               | After treatment              | 410            | 70                | 37             | 61.1±10.7   | 24.8±3.5                 | 30.0       |              | 16.8        | 17.6        | 40.2          | 4.39                   | 8                      |
| Jia et al. <sup>5</sup> (2019)          | China    | Prospective   | Hospital cohort  | Clinician-rated                    | Self-rated                      | Hamilton-D           | BAI               | During treatment             | 269            | 134               | 107            | 59±9.56     |                          | 19.0       |              | 40.5        | 37.5        | 100.0         |                        | 8                      |
| Cheng et al. <sup>6</sup> (2019)        | USA      | Prospective   | Hospital cohort  | Self-rated                         |                                 | CES-D                |                   | During treatment             | 266            | 64                |                | 62.91±10.26 |                          | 21.1       |              |             | 11.3        | 83.1          |                        | 7                      |
| Temtap and Nilmanat <sup>7</sup> (2018) | Thailand | Prospective   | Hospital cohort  | Self-rated                         | Self-rated                      | HADS                 | HADS              | During treatment             | 96             | 64                | 67             |             |                          | 18.8       |              |             |             |               |                        | 7                      |
| Agarwal et al. <sup>8</sup> (2018)      | USA      | Retrospective | Hospital cohort  | Self-reported                      | Self-reported                   |                      |                   | During treatment             | 149            | 32                | 15             | 63.6±7.48   |                          |            |              |             |             |               | 52.3                   | 8                      |
| Hwa et al. <sup>9</sup> (2015)          | USA      | Retrospective | Hospital cohort  | Self-reported                      | Self-reported                   |                      |                   | After treatment              | 100            | 36                |                | 63.33±5.27  | 28.6±5.2                 |            | 24.0         | 84.0        |             | 27.0          | 50.0                   | 8                      |
| Chang et al. <sup>10</sup> (2015)       | Taiwan   | Retrospective | Population-based | Clinician-rated                    |                                 | ICD-9/ DSM-V         |                   | During treatment             | 55,973         | 1,041             |                | 61.3±13.6   |                          | 32.5       | 13.1         |             |             | 36.5          |                        | 9                      |
| Hong and Tian <sup>11</sup> (2014)      | China    | Prospective   | Hospital cohort  | Self-rated                         | Self-rated                      | HADS                 | HADS              | After treatment              | 57             | 39                | 1              |             |                          |            |              |             |             |               |                        | 8                      |
| Mikoshiba et al. <sup>12</sup> (2013)   | Japan    | Retrospective | Hospital cohort  | Self-rated                         |                                 | CES-D                |                   | After treatment              | 127            | 36                |                | 69.02±8.4   |                          | 36.2       |              |             |             |               | 100.0                  | 7                      |
| Lai et al. <sup>13</sup> (2013)         | Taiwan   | Retrospective | Population-based | Clinician-rated                    |                                 | ICD-9/ DSM-V         |                   | At diagnosis                 | 1,815          | 114               |                | 74.31±6.29  |                          | 37.6       | 35.0         |             | 1.3         | 54.5          |                        | 8                      |
| Palmieri et al. <sup>14</sup> (2012)    | Italy    | Prospective   | Hospital cohort  | Clinician-rated                    |                                 | Hamilton-D           |                   | During treatment             | 32             | 15                |                |             |                          |            |              |             |             |               |                        | 8                      |
| Chu et al. <sup>15</sup> (2011)         | Taiwan   | Prospective   | Hospital cohort  | Self-rated                         |                                 | HADS                 |                   | After treatment              | 106            | 11                |                | 56.6±12.3   |                          | 20.8       |              |             |             |               | 100.0                  | 7                      |
| Jia et al. <sup>16</sup> (2010)         | China    | Prospective   | Hospital cohort  | Clinician-rated                    |                                 | Hamilton-D           |                   | After treatment              | 60             | 36                |                |             |                          |            |              |             |             |               |                        | 8                      |
| Tian et al. <sup>17</sup> (2006)        | China    | Retrospective | Hospital cohort  | Self-rated                         | Self-rated                      | SDS                  | SAS               | After treatment              | 112            | 60                | 58             |             |                          |            |              |             |             |               | 100.0                  | 7                      |

Values are presented as mean±standard deviation or number unless otherwise indicated.

BMI, body mass index; JBI, Joanna Briggs Institute; ICD-9, International Classification of Disease, ninth revision; DSM-V, Diagnostic and Statistical Manual of Mental Disorders, 5th edition; HADS, Hospital Anxiety and Depression Scale; BDI, Beck's Depression Inventory; BAI, Beck's Anxiety Inventory; CES-D, Center for Epidemiological Studies-Depression; SDS, Zung Self-Rating Depression Scale; SAS, Zung Self-Rating Anxiety Scale.
